# Supplementary material for: Determinants of Alcohol Consumption among Medical Students: Results from POLLEK Cohort Study
Source: MDPI journal article supplement (doi:10.3390/ijerph18115872), 2021-05-30
Supplement: s1 [file s1]

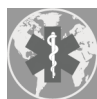

**Table S1.** Full version of the analysis of alcohol use regarding selected personal characteristics. Part A: Qualitative variables with numbers and frequencies (in brackets) and *p*-values. Part B: Quantitative variables with medians (Me) and interquartile ranges (IQR) in brackets and *p*-values. Missing values were not shown.

| Part A: Qualitative Variables                                        |                                    |                               |                                    |          |                               |                                    |          |
|----------------------------------------------------------------------|------------------------------------|-------------------------------|------------------------------------|----------|-------------------------------|------------------------------------|----------|
| Number (frequency) with the <i>p</i> -value ( <i>p</i> )             |                                    |                               |                                    |          |                               |                                    |          |
| Variable                                                             | Value                              | AUDIT ( <i>n</i> = 540)       |                                    |          | AUDIT C ( <i>N</i> = 544)     |                                    |          |
|                                                                      |                                    | HAZ<br><i>n</i> = 167 (30.9%) | Low risk<br><i>n</i> = 373 (69.1%) | <i>p</i> | HAZ<br><i>n</i> = 188 (34.6%) | Low risk<br><i>n</i> = 356 (65.4%) | <i>p</i> |
| Gender                                                               | Female                             | 71 (21.4%)                    | 261 (78.6%)                        | <0.001   | 78 (23.4%)                    | 255 (76.6%)                        | <0.001   |
|                                                                      | Male                               | 96 (46.2%)                    | 112 (53.8%)                        |          | 110 (52.1%)                   | 101 (47.9%)                        |          |
| Faculty                                                              | Katowice                           | 115 (34.2%)                   | 221 (65.8%)                        | 0.03     | 133 (39.2%)                   | 206 (60.8%)                        | 0.004    |
|                                                                      | Zabrze                             | 52 (25.5%)                    | 152 (74.5%)                        |          | 55 (26.8%)                    | 150 (73.2%)                        |          |
| Source of income-dependent on parents                                | Yes                                | 165 (31.9%)                   | 352 (68.1%)                        | 0.02     | 186 (35.8%)                   | 334 (64.2%)                        | 0.004    |
|                                                                      | No                                 | 2 (8.7%)                      | 21 (91.3%)                         |          | 2 (8.3%)                      | 22 (91.7%)                         |          |
| Smoking cigarette (3 categories)                                     | Never                              | 62 (19.7%)                    | 253 (80.3%)                        | <0.001   | 76 (23.9%)                    | 242 (76.1%)                        | <0.001   |
|                                                                      | Former                             | 67 (45.3%)                    | 81 (54.7%)                         |          | 74 (49.7%)                    | 75 (50.3%)                         |          |
|                                                                      | Current                            | 38 (49.4%)                    | 39 (50.6%)                         |          | 38 (49.4%)                    | 39 (50.6%)                         |          |
| Smoking cigarette (2 categories)                                     | Never                              | 62 (19.7%)                    | 253 (80.3%)                        | <0.001   | 76 (23.9%)                    | 242 (76.1%)                        | <0.001   |
|                                                                      | Ever                               | 105 (46.7%)                   | 120 (53.3%)                        |          | 112 (49.6%)                   | 114 (50.4%)                        |          |
| E-cigarettes (3 categories)                                          | Never                              | 73 (20.4%)                    | 285 (79.6%)                        | <0.001   | 88 (24.4%)                    | 273 (75.6%)                        | <0.001   |
|                                                                      | Former                             | 61 (45.5%)                    | 73 (54.5%)                         |          | 67 (50.0%)                    | 67 (50.0%)                         |          |
|                                                                      | Current                            | 29 (69.0%)                    | 13 (31.0%)                         |          | 28 (65.1%)                    | 15 (34.9%)                         |          |
| E-cigarettes (2 categories)                                          | Never                              | 73 (20.4%)                    | 285 (79.6%)                        | <0.001   | 88 (24.4%)                    | 273 (75.6%)                        | <0.001   |
|                                                                      | Ever                               | 90 (51.1%)                    | 86 (48.9%)                         |          | 95 (53.7%)                    | 82 (46.3%)                         |          |
| Under surveillance due to diagnosis of chronic disease               | Yes                                | 19 (26.4%)                    | 53 (73.6%)                         | 0.03     | 23 (31.5%)                    | 50 (68.5%)                         | NS       |
|                                                                      | No                                 | 17 (50.0%)                    | 17 (50.0%)                         |          | 14 (41.2%)                    | 20 (58.8%)                         |          |
| Take up sports activities to improve physical fitness                | At least 3 times a week for 30 min | 43 (37.1%)                    | 73 (62.9%)                         | 0.1      | 49 (41.5%)                    | 69 (58.5%)                         | 0.1      |
|                                                                      | Less often                         | 100 (30.6%)                   | 227 (69.4%)                        |          | 111 (33.7%)                   | 218 (66.3%)                        |          |
|                                                                      | Not at all                         | 24 (24.7%)                    | 73 (75.3%)                         |          | 28 (28.9%)                    | 69 (71.1%)                         |          |
| Take up sports activities to improve physical fitness (2 categories) | Yes                                | 143 (32.3%)                   | 300 (67.7%)                        | 0.2      | 160 (35.8%)                   | 287 (64.2%)                        | 0.2      |
|                                                                      | Not at all                         | 24 (24.7%)                    | 73 (75.3%)                         |          | 28 (28.9%)                    | 69 (71.1%)                         |          |

|                                                    |                                |             |             |       |             |             |        |
|----------------------------------------------------|--------------------------------|-------------|-------------|-------|-------------|-------------|--------|
| Number of meals containing animal protein          | 100% of meals                  | 28 (40.6%)  | 41 (59.4%)  | 0.2   | 31 (44.9%)  | 38 (55.1%)  | 0.05   |
|                                                    | In 75% of meals                | 85 (29.5%)  | 203 (70.5%) |       | 104 (35.7%) | 187 (64.3%) |        |
|                                                    | Less often                     | 54 (29.5%)  | 129 (70.5%) |       | 53 (28.8%)  | 131 (71.2%) |        |
| Consumption of fruit and vegetables                | Daily, at least in three meals | 19 (20.7%)  | 73 (79.3%)  | 0.07  | 22 (23.9%)  | 70 (76.1%)  | 0.05   |
|                                                    | Daily, at least in two meals   | 88 (33.5%)  | 175 (66.5%) |       | 101 (38.0%) | 165 (62.0%) |        |
|                                                    | Less often                     | 58 (31.7%)  | 125 (68.3%) |       | 64 (34.8%)  | 120 (65.2%) |        |
| Consumption of fruit and vegetables (2 categories) | Daily                          | 107 (30.1%) | 248 (69.9%) | 0.8   | 123 (34.4%) | 235 (65.6%) | 0.99   |
|                                                    | Less often                     | 58 (31.7%)  | 125 (68.3%) |       | 64 (34.8%)  | 120 (65.2%) |        |
|                                                    | <20                            | 32 (21.3%)  | 118 (78.7%) |       | 34 (22.7%)  | 116 (77.3%) |        |
| BMI (3 categories)                                 | 20–25                          | 96 (31.7%)  | 207 (68.3%) | 0.001 | 113 (36.9%) | 193 (63.1%) | <0.001 |
|                                                    | >25                            | 37 (44.0%)  | 47 (56.0%)  |       | 40 (47.1%)  | 45 (52.9%)  |        |

**Part B: Quantitative Variables**  
**Median and interquartile range (IQR)**

| Variable                        | AUDIT                 |                            |          | AUDIT-C               |                            |          |
|---------------------------------|-----------------------|----------------------------|----------|-----------------------|----------------------------|----------|
|                                 | HAZ<br><i>n</i> = 167 | Low risk<br><i>n</i> = 373 | <i>p</i> | HAZ<br><i>n</i> = 188 | Low risk<br><i>n</i> = 356 | <i>p</i> |
| Age (years)                     | 19 (19–20)            | 19 (19–20)                 | 0.1      | 19 (19–20)            | 19 (19–20)                 | 0.3      |
| Weight (kg)                     | 70 (60–80)            | 62 (55.3–71)               | <0.001   | 70 (61.2–80)          | 61 (55–70)                 | <0.001   |
| Height (cm)                     | 176 (168–182)         | 170 (164–176)              | <0.001   | 176 (169–182)         | 169.7 (164–176)            | <0.001   |
| BMI (kg/m <sup>2</sup> )        | 22.9 (2.4–24.7)       | 21.5 (19.6–23.6)           | <0.001   | 23 (2.5–24.7)         | 21.4 (19.6–23.4)           | <0.001   |
| Diastolic blood pressure (mmHg) | 73 (66–80)            | 75 (67–80)                 | 0.2      | 74 (67.8–80)          | 75 (67–80)                 | 0.7      |
| Dystolic blood pressure (mmHg)  | 120 (111–127)         | 119 (110–124)              | 0.01     | 120 (111.8–128)       | 118 (110–124)              | <0.001   |
| AUDIT score                     | 10 (9–13)             | 3 (2–5)                    | <0.001   | 10 (7–13)             | 3 (2–5)                    | <0.001   |
| Hazardous Alcohol Use domain    | 6 (5–7)               | 3 (2–4)                    | <0.001   | 6 (5–7)               | 3 (1–4)                    | <0.001   |
| Dependence Symptoms domain      | 1 (1–2)               | 0 (0–0)                    | <0.001   | 1 (0–2)               | 0 (0–1)                    | <0.001   |
| Harmful Alcohol Use domain      | 3 (2–5)               | 0 (0–1)                    | <0.001   | 2 (1–4)               | 0 (0–1)                    | <0.001   |
| BREF score                      | 79 (71–85)            | 81 (73–87)                 | 0.06     | 80 (73–85)            | 80 (72.8–87)               | 0.7      |
| BREF physical domain            | 18 (16.5–21)          | 19 (17–22)                 | 0.08     | 19 (17–21)            | 19 (17–21)                 | 0.9      |
| BREF psychological domain       | 20 (18–23)            | 21 (19–23)                 | 0.03     | 21 (18–23)            | 21 (18–23)                 | 0.7      |
| BREF social domain              | 12 (10–13)            | 12 (10–13)                 | 0.3      | 12 (10–13)            | 12 (10–13)                 | 0.5      |
| BREF environmental domain       | 29 (26–31)            | 29 (26–31)                 | 0.4      | 29 (26–31)            | 29 (26–31)                 | 0.9      |

**Table S2.** Full version of the review of selected studies assessing alcohol use among students and doctors.

| Country and studied group | Year      | G              | n             | Prevalence (%)    |                                               |                                          |                | AUDIT cut    |    | AUDIT score          |                            | AUDIT-C      |    |                                        |
|---------------------------|-----------|----------------|---------------|-------------------|-----------------------------------------------|------------------------------------------|----------------|--------------|----|----------------------|----------------------------|--------------|----|----------------------------------------|
|                           |           |                |               | HAZ               | SEX                                           | HAR                                      | smoke          | HAZ          | D  | Me                   | Mn                         | HAZ          | Me | Mn                                     |
| Brazil [27]               | -         | S              | 398           | 22.4              | -                                             | -                                        | -              | 8            | 16 | -                    | -                          | -            | -  | -                                      |
| Finland [12]              | 2007      | S              | 465           | 33                | M: 49.0<br>F: 24.0                            | -                                        | 22.7           | -            | -  | -                    | -                          | M: 6<br>F: 5 | -  | M: 5.5<br>F: 3.3                       |
| France [21]               | 2018      | P              | 515           | 12.6              | F                                             | 1.2                                      | 25.0           | 8            | 16 | 3                    | -                          | M: 5<br>F: 4 | 3  | -                                      |
| France [28]               | 2011      | S              | 171           | 11                | -                                             | 21                                       | 21 #/16 ^      | 8            | 13 | -                    | -                          | -            | -  | -                                      |
| France [9]                | 2012–2013 | S              | 198           | 31.9              | F                                             | -                                        | 16.0           | M: 7<br>F: 6 | 13 | T: 5<br>M: 5<br>F: 4 | T: 5.6<br>M: 6.2<br>F: 5.2 | -            | -  | -                                      |
| German [29]               | 2005      | S              | 80            | 24                | M: 38.0<br>F: 15.0                            | -                                        | -              | 8            | -  | -                    | -                          | -            | -  | -                                      |
| Italy [3]                 | -         | S<br>(S, N, P) | 641<br>(1500) | 6.1               | M: 4.2<br>F: 7.6<br>(F)<br>(M: 5.5<br>F: 7.1) | -                                        | 16.6<br>(21.7) | -            | -  | -                    | -                          | M: 4<br>F: 3 | -  | M: 1.5<br>F: 1.0<br>(M: 1.6<br>F: 1.1) |
| Korea [5]                 | 2016      | S              | 323           | 45.5              | M                                             | M: 18.4<br>F: 7.6<br>T: 13.6             | 18.3           | 8            | 16 | -                    | M: 9.8<br>F: 6.3<br>T: 8.1 | -            | -  | -                                      |
| Korea [18]                | 2016      | N              | 922           | 44.6 <sup>B</sup> | M: 56.9<br>F: 34.1                            | M: 11.2<br>F: 8.1<br>T: 9.5 <sup>H</sup> | 8.1            | M: 9<br>F: 6 | -  | -                    | M: 12.8<br>F: 1.7          | -            | -  | -                                      |
| Nepal [13]                | 2017      | S              | 588           | 47.8 *            | -                                             | 15.3                                     | 19.6           | -            | -  | -                    | -                          | -            | -  | -                                      |
| Netherlands [2]           | 2015–2016 | N              | 5401          | 2.0               | M                                             | -                                        | -              | 11           | -  | -                    | -                          | M: 8<br>F: 7 | -  | M: 6.2<br>F: 4.6<br>T: 5.2             |
| Paraguay [14]             | -         | S              | 157           | 49 **             | F                                             | -                                        | -              | -            | -  | -                    | -                          | M: 4<br>F: 3 | -  | -                                      |
| Poland [6]                | 2011–2012 | S              | 194           | 54.1              | M: 67.1<br>F: 5.0                             | -                                        | 19.6           | -            | -  | -                    | -                          | M: 5<br>F: 4 | -  | -                                      |
| Poland [10]               | -         | S, N, P        | 268           | 16.8              | -                                             | 1.9                                      | -              | 8            | 16 | -                    | -                          | -            | -  | -                                      |
| Poland [4]                | 2019      | S<br>(S, O)    | 405<br>(877)  | -                 | -                                             | -                                        | -              | 8            | 22 | -                    | 17                         | -            | -  | -                                      |
| Poland [7]                | 2010–2013 | S              | 635           | 47.1              | M: 58.0<br>F: 4.5                             | -                                        | 17.8           | -            | -  | -                    | -                          | M: 5<br>F: 4 | -  | -                                      |
| Poland [11]               | -         | N              | 500           | 65.0              | -                                             | -                                        | -              | -            | -  | -                    | 11.2                       | -            | -  | -                                      |

|                             |           |             |               |              |                    |              |            |              |    |   |     |   |   |   |
|-----------------------------|-----------|-------------|---------------|--------------|--------------------|--------------|------------|--------------|----|---|-----|---|---|---|
| Spain [39]                  | 2008–2011 | S           | 192           | 49.5         | M: 5.9<br>F: 48.1  | -            | 1.8        | M: 9<br>F: 6 | -  | - | 6.5 | - | - | - |
| Sweden [15]                 | 2006      | S<br>(N)    | 408<br>(342)  | -            | M                  | 17.2<br>(31) | -          | 11 &         | -  | - | -   | - | - | - |
| United Kingdom [17]         | -         | S           | 244           | 47.1         | M: 54.3<br>F: 42.3 | -            | -          | 8            | -  | - | -   | - | - | - |
| United Kingdom [16]         | 2014      | S<br>(S, N) | 820<br>(1136) | 4.5<br>(4.7) | -                  | 5.2<br>(6.9) | 3.5<br>(6) | 8            | 20 | - | -   | - | - | - |
| United State of America [8] | 2004–2005 | S           | 2710          | 18.1         | M                  | -            | -          | 8            | -  | - | -   | - | - | - |

G, group (target population); *n*, number of participants; HAZ, hazardous alcohol users; SEX, gender predominance of alcohol risky use; HAR, harmful alcohol users; D, dependence; Me, median; Mn, mean; S, medical students; N, other students; P, physicians O, others; M, male; F, female; T, total group; -, not available/not applicable; \* alcohol users; <sup>B</sup> binge drinking; \*\* alcohol misuse/dependence; <sup>H</sup> heavy drinking; <sup>#</sup> daily smoker; <sup>^</sup> occasional smoker; & cutoff for harmful alcohol use.
